# Supplementary material for: My Child Is Islet Autoantibody Positive: Impact on Parental Anxiety
Source: Oxford University Press journal article supplement (doi:10.2337/dc17-0166), 2017-06-29
Supplement: dc170166supplementarydata.pdf [file dc170166supplementarydata.pdf]

## SUPPLEMENTARY DATA

### **The TEDDY Study Group**

**Colorado Clinical Center:** Marian Rewers, M.D., Ph.D., PI<sup>1,4,5,6,10,11</sup>, Kimberly Bautista<sup>12</sup>, Judith Baxter<sup>9,10,12,15</sup>, Ruth Bedoy<sup>2</sup>, Daniel Felipe-Morales, Kimberly Driscoll, Ph.D.<sup>9</sup>, Brigitte I. Frohnert, M.D.<sup>2,14</sup>, Patricia Gesualdo<sup>2,6,12,14,15</sup>, Michelle Hoffman<sup>12,13,14</sup>, Rachel Karban<sup>12</sup>, Edwin Liu, M.D.<sup>13</sup>, Jill Norris, Ph.D.<sup>2,3,12</sup>, Adela Samper-Imaz, Andrea Steck, M.D.<sup>3,14</sup>, Kathleen Waugh<sup>6,7,12,15</sup>, Hali Wright<sup>12</sup>. University of Colorado, Anschutz Medical Campus, Barbara Davis Center for Childhood Diabetes.

**Finland Clinical Center:** Jorma Toppari, M.D., Ph.D., PI<sup>1,4,11,14</sup>, Olli G. Simell, M.D., Ph.D.<sup>1,4,11,13</sup>, Annika Adamsson, Ph.D.<sup>12</sup>, Suvi Ahonen<sup>\*±§</sup>, Heikki Hyöty, M.D., Ph.D.<sup>\*±6</sup>, Jorma Ilonen, M.D., Ph.D.<sup>¥</sup> ¶<sup>3</sup>, Sanna Jokipuu<sup>^</sup>, Tiina Kallio<sup>^</sup>, Leena Karlsson<sup>^</sup>, Miia Kähönen<sup>µπ</sup>, Mikael Knip, M.D., Ph.D.<sup>\*±5</sup>, Lea Kovanen<sup>\*±§</sup>, Mirva Koreasalo<sup>\*±§2</sup>, Kalle Kurppa, M.D., Ph.D.<sup>\*±13</sup>, Tiina Latva-aho<sup>µπ</sup>, Maria Lönnrot, M.D., Ph.D.<sup>\*±6</sup>, Elina Mäntymäki<sup>^</sup>, Katja Multasuo<sup>µπ</sup>, Juha Mykkänen, Ph.D.<sup>¥</sup> ¶<sup>3</sup>, Tiina Niinen<sup>\*±12</sup>, Sari Niinistö<sup>±§</sup>, Mia Nyblom<sup>\*±</sup>, Petra Rajala<sup>^</sup>, Jenna Rautanen<sup>±§</sup>, Anne Riikonen<sup>\*±§</sup>, Mika Riikonen<sup>^</sup>, Jenni Rouhiainen<sup>^</sup>, Minna Romo<sup>^</sup>, Tuula Simell, Ph.D., Ville Simell<sup>¥13</sup>, Maija Sjöberg<sup>¥12,14</sup>, Aino Stenius<sup>µπ12</sup>, Maria Leppänen<sup>^</sup>, Sini Vainionpää<sup>^</sup>, Eeva Varjonen<sup>¥12</sup>, Riitta Veijola, M.D., Ph.D.<sup>µπ14</sup>, Suvi M. Virtanen, M.D., Ph.D.<sup>\*±§2</sup>, Mari Vähä-Mäkilä<sup>^</sup>, Mari Åkerlund<sup>\*±§</sup>, Katri Lindfors, Ph.D.<sup>\*13</sup> ¥<sup>University of Turku, \*University of Tampere, µUniversity of Oulu, ^Turku University Hospital, Hospital District of Southwest Finland, ±Tampere University Hospital, πOulu University Hospital, §National Institute for Health and Welfare, Finland, ¶University of Kuopio.</sup>

**Georgia/Florida Clinical Center:** Jin-Xiong She, Ph.D., PI<sup>1,3,4,11</sup>, Desmond Schatz, M.D.<sup>\*4,5,7,8</sup>, Diane Hopkins<sup>12</sup>, Leigh Steed<sup>12,13,14,15</sup>, Jamie Thomas<sup>\*6,12</sup>, Janey Adams<sup>\*12</sup>, Katherine Silvis<sup>2</sup>, Michael Haller, M.D.<sup>\*14</sup>, Melissa Gardiner, Richard McIndoe, Ph.D., Ashok Sharma, Joshua Williams, Gabriela Young, Stephen W. Anderson, M.D.<sup>^</sup>, Laura Jacobsen, M.D.<sup>\*14</sup>. Center for Biotechnology and Genomic Medicine, Augusta University. \*University of Florida, ^Pediatric Endocrine Associates, Atlanta.

**Germany Clinical Center:** Anette G. Ziegler, M.D., PI<sup>1,3,4,11</sup>, Andreas Beyerlein, Ph.D.<sup>2</sup>, Ezio Bonifacio Ph.D.<sup>\*5</sup>, Michael Hummel, M.D.<sup>13</sup>, Sandra Hummel, Ph.D.<sup>2</sup>, Kristina Foterek<sup>¥2</sup>, Nicole Janz, Mathilde Kersting, Ph.D.<sup>¥2</sup>, Annette Knopff<sup>7</sup>, Sibylle Koletzko, M.D.<sup>¶13</sup>, Claudia Peplow<sup>12</sup>, Roswith Roth, Ph.D.<sup>9</sup>, Marlon Scholz, Joanna Stock<sup>9,12,14</sup>, Katharina Warncke, M.D.<sup>14</sup>, Lorena Wendel, Christiane Winkler, Ph.D.<sup>2,12,15</sup>. Forschergruppe Diabetes e.V. and Institute of Diabetes Research, Helmholtz Zentrum München, and Klinikum rechts der Isar, Technische Universität München. \*Center for Regenerative Therapies, TU Dresden, ¶Dr. von Hauner Children's Hospital, Department of Gastroenterology, Ludwig Maximilians University Munich, ¥Research Institute for Child Nutrition, Dortmund.

**Sweden Clinical Center:** Åke Lernmark, Ph.D., PI<sup>1,3,4,5,6,8,10,11,15</sup>, Daniel Agardh, M.D., Ph.D.<sup>13</sup>, Carin Andréon Aronsson<sup>2,12,13</sup>, Maria Ask, Jenny Bremer, Ulla-Marie Carlsson, Corrado Cilio, Ph.D., M.D.<sup>5</sup>, Emelie Ericson-Hallström, Lina Fransson, Thomas Gard, Joanna Gerardsson, Rasmus Bennet, Monica Hansen, Gertie Hansson, Susanne Hyberg, Fredrik Johansen, Berglind Jonsdottir, M.D., Helena Elding Larsson, M.D., Ph.D.<sup>6,14</sup>, Marielle Lindström, Markus Lundgren, M.D.<sup>14</sup>, Maria Månsson-Martinez, Maria Markan, Jessica Melin<sup>12</sup>, Zeliha Mestan, Karin Ottosson, Kobra Rahmati, Anita Ramelius, Falastin Salami, Sara Sibthorpe, Birgitta Sjöberg, Ulrica Swartling, Ph.D.<sup>9,12</sup>, Evelyn Tekum Amboh, Carina Törn, Ph.D.<sup>3,15</sup>, Anne Wallin, Åsa Wimar<sup>12,14</sup>, Sofie Åberg. Lund University.

**Washington Clinical Center:** William A. Hagopian, M.D., Ph.D., PI<sup>1,3,4, 5, 6,7,11,13, 14</sup>, Michael Killian<sup>6,7,12,13</sup>, Claire Cowen Crouch<sup>12,14,15</sup>, Jennifer Skidmore<sup>2</sup>, Josephine Carson, Maria Dalzell, Kayleen Dunson, Rachel Hervey, Corbin Johnson, Rachel Lyons, Arlene Meyer, Denise Mulenga, Alexander Tarr, Morgan Uland, John Willis. Pacific Northwest Diabetes Research Institute.

**Pennsylvania Satellite Center:** Dorothy Becker, M.D., Margaret Franciscus, MaryEllen Dalmagro-Elias Smith<sup>2</sup>, Ashi Daftary, M.D., Mary Beth Klein, Chrystal Yates. Children's Hospital of Pittsburgh of UPMC.

**Data Coordinating Center:** Jeffrey P. Krischer, Ph.D., PI<sup>1,4,5,10,11</sup>, Michael Abbondandolo, Sarah Austin-Gonzalez, Maryouri Avendano, Sandra Baethke, Rasheedah Brown<sup>12,15</sup>, Brant Burkhardt, Ph.D.<sup>5,6</sup>, Martha Butterworth<sup>2</sup>, Joanna Clasen, David Cuthbertson, Christopher Eberhard, Steven Fiske<sup>9</sup>, Dena Garcia, Jennifer Garmeson, Veena Gowda, Kathleen Heyman, Francisco Perez Laras, Hye-Seung Lee, Ph.D.<sup>1,2,13,15</sup>, Shu Liu, Xiang Liu, Ph.D.<sup>2,3,9,14</sup>, Kristian Lynch, Ph.D.<sup>5,6,9,15</sup>, Jamie Malloy, Cristina McCarthy<sup>12,15</sup>, Steven Meulemans, Hemang Parikh, Ph.D.<sup>3</sup>, Chris Shaffer, Laura Smith, Ph.D.<sup>9,12</sup>, Susan Smith<sup>12,15</sup>, Noah Sulman, Ph.D., Roy Tamura, Ph.D.<sup>1,2,13</sup>, Ulla Uusitalo, Ph.D.<sup>2,15</sup>, Kendra Vehik, Ph.D.<sup>4,5,6,14,15</sup>, Ponni Vijayakandipan, Keith Wood, Jimin Yang, Ph.D., R.D.<sup>2,15</sup>. *Past staff: Lori Ballard, David Hadley, Ph.D., Wendy McLeod.* University of South Florida.

## SUPPLEMENTARY DATA

**Project scientist:** Beena Akolkar, Ph.D.<sup>1,3,4,5,6,7,10,11</sup>. National Institutes of Diabetes and Digestive and Kidney Diseases.

**Autoantibody Reference Laboratories:** Liping Yu, M.D.<sup>^5</sup>, Dongmei Miao, M.D.<sup>^</sup>, Polly Bingley, M.D., FRCP<sup>\*5</sup>, Alistair Williams<sup>\*</sup>, Kyla Chandler<sup>\*</sup>, Saba Rokni<sup>\*</sup>, Claire Williams<sup>\*</sup>, Rebecca Wyatt<sup>\*</sup>, Gifty George<sup>\*</sup>, Sian Grace<sup>\*</sup>. <sup>^</sup>Barbara Davis Center for Childhood Diabetes, University of Colorado Denver, <sup>\*</sup>School of Clinical Sciences, University of Bristol UK.

**HLA Reference Laboratory:** Henry Erlich, Ph.D.<sup>3</sup>, Steven J. Mack, Ph.D., Anna Lisa Fear. Center for Genetics, Children's Hospital Oakland Research Institute.

**Repository:** Sandra Ke, Niveen Mulholland, Ph.D. NIDDK Biosample Repository at Fisher BioServices.

**Other contributors:** Kasia Bourcier, Ph.D.<sup>5</sup>, National Institutes of Allergy and Infectious Diseases. Thomas Briese, Ph.D.<sup>6,15</sup>, Columbia University. Suzanne Bennett Johnson, Ph.D.<sup>9,12</sup>, Florida State University. Eric Triplett, Ph.D.<sup>6</sup>, University of Florida.

***Committees:***

<sup>1</sup>Ancillary Studies, <sup>2</sup>Diet, <sup>3</sup>Genetics, <sup>4</sup>Human Subjects/Publicity/Publications, <sup>5</sup>Immune Markers, <sup>6</sup>Infectious Agents, <sup>7</sup>Laboratory Implementation, <sup>8</sup>Maternal Studies, <sup>9</sup>Psychosocial, <sup>10</sup>Quality Assurance, <sup>11</sup>Steering, <sup>12</sup>Study Coordinators, <sup>13</sup>Celiac Disease, <sup>14</sup>Clinical Implementation, <sup>15</sup>Quality Assurance Subcommittee on Data Quality.

SUPPLEMENTARY DATA

**Supplementary Table 1. Factors Associated with Parents' SAI Scores One to Four Years after Initial IA+ Test Result**

| Factors                                 | Mothers |               |         | Fathers    |               |         |
|-----------------------------------------|---------|---------------|---------|------------|---------------|---------|
|                                         | B       | 95%CI         | p-value | B          | 95%CI         | p-value |
| <b>Country</b>                          |         |               |         |            |               |         |
| <b>US</b>                               | 0.00    | ref           |         | 0.00       | ref           |         |
| <b>Finland</b>                          | -0.82   | -2.05 – +0.46 | 0.19    | -1.29      | -2.59 – -0.01 | 0.04    |
| <b>Germany</b>                          | -2.75   | -4.89 – -0.61 | 0.01    | -2.27      | -4.64 – +0.11 | 0.06    |
| <b>Sweden</b>                           | -0.30   | -0.70 – -1.30 | 0.56    | -0.39      | -1.45 – +0.67 | 0.47    |
| <b>FDR</b>                              |         |               |         |            |               |         |
| <b>no</b>                               | 0.00    | ref           |         | 0.00       | ref           |         |
| <b>yes</b>                              | 0.97    | -0.29 – +2.24 | 0.13    | 1.32       | +0.20 – +2.85 | 0.09    |
| <b>Ethnic minority</b>                  |         |               |         |            |               |         |
| <b>no</b>                               | 0.00    | ref           |         | 0.00       | ref           |         |
| <b>yes</b>                              | 1.98    | +0.63 – +3.33 | 0.004   | 0.68       | -0.81 – +2.17 | 0.37    |
| <b>Risk perception</b>                  |         |               |         |            |               |         |
| <b>underestimate</b>                    | 0.00    | ref           |         | 0.00       | ref           |         |
| <b>accurate</b>                         | 1.59    | +0.78 – +2.40 | <0.0001 | 1.72       | +0.91 – +2.53 | <0.0001 |
| <b>SAI after the first IA+ test</b>     | 0.65    | +0.60 – +0.70 | <0.0001 | 0.66       | +0.60 – +0.71 | <0.0001 |
| <b>Time since first IA+ test result</b> | -0.33   | -0.53 – -0.13 | 0.001   | -0.27<br>0 | -0.53 – -0.03 | 0.03    |
| <b>Child's IA Status</b>                |         |               |         |            |               |         |
| <b>nonpersistent IA+</b>                | 0.00    | ref           |         | 0.00       | ref           |         |
| <b>single persistent IA+</b>            | 1.04    | +0.06 – +2.01 | 0.008   | 0.63       | +0.32 – +1.58 | 0.20    |
| <b>multiple persistent IA+</b>          | 3.91    | +2.88 – +4.93 | <0.0001 | 2.97       | +1.86 – +4.08 | <0.0001 |
